# Supplementary material for: Chemical and toxicological assessment of leachates from UV-degraded plastic materials using in-vitro bioassays
Source: PeerJ. 2023 Apr 11;11:e15192. doi: 10.7717/peerj.15192 (PMC10103695; doi:10.7717/peerj.15192)
Supplement: Supplemental Information 3 [file peerj-11-15192-s003.xlsx]

## Sheet: Tabelle1
			1. Replicate		2. Replicate		3. Replicate		Mean and SD
		sample ID	IR -S9	IR +S9	IR -S9	IR +S9	IR -S9	IR +S9	Mean -S9	SD -S9	Mean +S9	SD +S9
T2	Blank 1	52	1.09226	1.29776	1.07926	1.01732	1.17278	1.15693	1.11476	0.0506599	1.15733	0.140222	1.5
	LDPE	11	1.28595	1.12181	1.17013	0.793059	0.969764	1.13291	1.14195	0.159965	1.01593	0.193089	1.5
	LDPE-R	8	1.22469	1.36509	1.23898	1.02752	1.20218	1.10162	1.22195	0.0185522	1.16474	0.177414	1.5
	PP-H	50	0.932176	1.35937	0.848147	1.02564	1.09158	1.42966	0.957301	0.123646	1.27155	0.215851	1.5
	PP-C	10	1.16246	1.19441	1.16539	0.76782	0.872955	0.875887	1.06694	0.167998	0.946041	0.221781	1.5
	PS-GP	12	1.82584	1.16303	1.31509	0.756285	1.4101	0.975376	1.51701	0.271644	0.964898	0.203576	1.5
	PS-HI	13	1.71095	1.13989	1.63007	0.711032	1.30337	0.91449	1.54813	0.215793	0.921805	0.214524	1.5
	PET-A	2	1.002	1.30582	0.850577	0.905885	0.627979	1.15977	0.826851	0.188134	1.12383	0.202378	1.5
	PET-RR	3	1.02045	1.18407	1.02635	0.836437	0.62774	1.27624	0.891514	0.228454	1.09891	0.231937	1.5
	Bio-PBS	4	0.795448	1.234	0.753372	1.10934	0.644149	1.15453	0.73099	0.0780936	1.16595	0.0631096	1.5
	SB	6	1.66789	1.09563	1.49336	0.915625	1.39893	1.19561	1.52006	0.136456	1.06896	0.141885	1.5
	PVC-R	5	1.01309	1.26694	0.972535	1.24484	0.667745	1.24027	0.884455	0.188769	1.25068	0.0142646	1.5
	PVC-A	51	1.46898	0.954734	1.3201	1.1691	1.54038	1.15352	1.44315	0.112388	1.09245	0.119523	1.5
T1	Blank 2	55	1.19163	0.974502	0.876905	1.35686	1.13497	1.42409	1.06784	0.167761	1.25182	0.242504
	LDPE	21	1.05764	1.24674	1.05259	0.971256	1.16763	1.05493	1.09262	0.0650132	1.09097	0.141235
	LDPE-R	17	1.75137	1.33803	1.45865	1.34674	1.38998	0.90782	1.53334	0.191922	1.19753	0.250935
	PP-H	22	0.971332	1.23328	1.19243	0.922986	1.2749	1.26366	1.14622	0.15697	1.13998	0.188533
	PP-C	23	1.06611	1.35204	1.29071	1.02713	1.26002	1.25753	1.20561	0.121783	1.21223	0.167124
	PS-GP	24	1.06404	1.26394	1.39588	1.03026	1.16403	1.43336	1.20799	0.170229	1.24252	0.202402
	PS-HI	25	0.983614	0.994243	1.20757	1.02295	1.14195	1.23169	1.11104	0.115131	1.08296	0.129602
	PET-A	14	1.30643	1.04654	1.12539	0.871931	1.11042	0.977505	1.18075	0.109101	0.965326	0.0879404
	PET-RR	15	1.2668	1.21197	1.17152	1.31815	1.11028	1.18684	1.18287	0.0788721	1.23899	0.0696987
	Bio-PBS	16	1.29898	1.18697	1.08001	1.55092	1.01522	0.930812	1.1314	0.148698	1.2229	0.311613
	SB	18	1.63562	1.16175	1.34692	0.985035	1.55211	1.2815	1.51155	0.14856	1.14276	0.14914
	PVC-R	54	1.33554	1.25208	1.16987	1.28271	1.14706	1.18822	1.21749	0.102871	1.241	0.048211
	PVC-A	53	1.26433	1.16802	1.22253	1.22693	1.80811	1.24593	1.43165	0.326685	1.21363	0.0406205
T3	Blank 3	58	1.27726	1.01437	0.969393	1.16196	1.10635	0.991619	1.11767	0.154245	1.05598	0.0924817
	LDPE	37	0.926787	1.00799	0.881164	1.53544	1.01491	1.10841	0.940954	0.067991	1.21728	0.28007
	LDPE-R	26	1.33977	1.03559	1.85201	1.2261	1.46939	0.940428	1.55372	0.266329	1.06737	0.145466
	PP-H	33	1.22468	1.42663	1.29171	1.25726	1.18499	1.06505	1.2338	0.0539369	1.24965	0.180906
	PP-C	34	1.08204	1.26087	1.34909	1.15391	1.18095	1.19892	1.20403	0.135012	1.20457	0.0537016
	PS-GP	35	1.03623	0.992131	0.924775	1.40066	1.04109	1.02978	1.0007	0.0657967	1.14086	0.225784
	PS-HI	36	1.01399	0.924845	0.974195	1.44179	1.13409	1.3323	1.04076	0.0832418	1.23298	0.27241
	PET-A	27	1.89742	1.37887	1.44992	1.17061	1.14592	1.2543	1.49775	0.378023	1.26793	0.104798
	PET-RR	28	1.2219	1.40112	1.37927	0.98154	1.28823	1.22177	1.29646	0.0790098	1.20148	0.210527
	Bio-PBS	29	1.26974	1.33134	1.39519	1.24009	1.21093	1.42446	1.29195	0.0941177	1.33197	0.0921857
	SB	30	1.93479	1.21816	1.53255	1.11016	1.41098	1.17372	1.62611	0.274148	1.16735	0.0542772
	PVC-R	57	1.11992	1.33297	1.14475	1.33253	1.15672	1.26389	1.14047	0.0187692	1.3098	0.0397585
	PVC-A	56	1.64628	1.16719	1.43585	1.04649	1.41763	1.28736	1.49992	0.127081	1.16701	0.120434
T4	Blank 4	61	0.741743	1.13278	1.4474	1.25427	0.617553	1.19108	0.935566	0.447591	1.19271	0.0607623
	LDPE	49	1.03843	1.51148	0.965393	1.04475	0.925891	1.23605	0.976571	0.0570946	1.26409	0.234624
	LDPE-R	38	1.16017	1.14727	1.72984	1.56445	1.68015	1.14163	1.52339	0.315535	1.28445	0.242502
	PP-H	45	1.17726	1.22321	0.619579	1.07781	1.04898	0.977993	0.948606	0.292076	1.093	0.12331
	PP-C	46	1.24243	1.38524	0.73796	1.06004	0.994916	1.22007	0.991769	0.252249	1.22178	0.162605
	PS-GP	47	1.16611	1.09094	0.884581	1.05802	1.06294	1.26723	1.03788	0.142426	1.13873	0.112495
	PS-HI	48	1.29538	1.17886	1.02755	1.17023	1.03272	1.29945	1.11855	0.15316	1.21618	0.0722447
	PET-A	39	1.30235	0.976146	1.19576	1.4675	1.07016	1.10488	1.18942	0.116223	1.18284	0.254786
	PET-RR	40	1.52399	0.773172	1.08235	1.49412	1.0543	1.02006	1.22021	0.26345	1.09578	0.366393
	Bio-PBS	41	1.34933	0.845539	1.22787	1.60209	1.08212	1.08509	1.21977	0.133788	1.17757	0.386664
	SB	43	1.92241	1.26304	1.89886	1.12147	1.83753	1.2109	1.88627	0.0438171	1.19847	0.0716002
	PVC-R	60	0.846385	1.14334	1.39276	1.30383	0.587076	1.2399	0.942074	0.411278	1.22903	0.0807946
	PVC-A	59	1.41577	1.0358	1.01377	1.26871	1.42755	1.26078	1.2857	0.235571	1.18843	0.132241
		IF > 1.5 in replicate
		Mean IF > 1.5 and at least two replicates with IF > 1.5
		Mean IF > 1.5, but only one replicate with IF > 1.5
