# Supplementary material for: Chemical and toxicological assessment of leachates from UV-degraded plastic materials using in-vitro bioassays
Source: PeerJ. 2023 Apr 11;11:e15192. doi: 10.7717/peerj.15192 (PMC10103695; doi:10.7717/peerj.15192)
Supplement: Supplemental Information 4 [file peerj-11-15192-s004.xlsx]

## Sheet: Tabelle
		sample	Mean -S9	SD -S9	sample	Mean +S9	SD +S9	limt value
	T2	Blank	1.36625	0.000883316	Blank	1.10423	0.236156	1.5
		LDPE (5.34 g/mL)	1.28646	0.16162	LDPE (5.34 g/mL)	1.26129	0.0957079	1.5
		LDPE-R (2.67 g/mL)	1.62024	0.100279	LDPE-R (5.34 g/mL)	1.63626	0.0415101	1.5
		PP-H (5.34 mg/mL)	1.1294	0.13503	PP-H (5.34 g/mL)	1.18482	0.24869	1.5
		PP-C (5.34 g/mL)	1.26052	0.0623193	PP-C (5.34 g/mL)	1.21349	0.129439	1.5
		PS-GP (5.34 g/mL)	1.82735	0.794368	PS-GP (5.34 g/mL)	1.39028	0.125391	1.5
		PS-HI (5.34 g/mL)	1.54493	0.303519	PS-GP (5.34 g/mL)	1.43107	0.0917848	1.5
		PET-A (5.34 g/mL)	1.36919	0.188352	PET-A (5.34 g/mL)	1.29323	0.181443	1.5
		PET-R (5.34 g/mL)	1.13123	0.132443	PET-R (5.34 g/mL)	1.29757	0.0892306	1.5
		Bio-PBS (5.34 g/mL)	1.63486	0.219693	Bio-PBS (5.34 g/mL)	1.46948	0.0362779	1.5
		SB (2.94 g/mL)	1.79572	0.216791	SB (2.94 g/mL)	1.38647	0.28397	1.5
		PVC-R (5.34 g/mL)	1.2911	0.105398	PVC-R (5.34 g/mL)	1.21496	0.0795515	1.5
		PVC-A (5.34 g/mL)	1.54468	0.347219	PVC-A (5.34 g/mL)	1.30601	0.267453	1.5
	T1	Blank	1.2	0	Blank	1.2	0.1
		LDPE (5.34 g/mL)	1.09741	0.0783615	LDPE (5.34 g/mL)	1.10326	0.113308
		LDPE-R (1.3 g/mL)	1.54585	0.0335307	LDPE-R (5.34 g/mL)	1.4276	0.406002
		PP-H (5.34 mg/mL)	1.21693	0.361852	PP-H (5.34 g/mL)	1.06944	0.225346
		PP-C (5.34 g/mL)	1.15605	0.405777	PP-C (5.34 g/mL)	1.16878	0.419762
		PS-GP(5.34 g/mL)	1.31544	0.38358	PS-GP (5.34 g/mL)	1.23649	0.365743
		PS-HI (5.34 g/mL)	1.0681	0.0307751	PS-GP (5.34 g/mL)	0.916947	0.0404073
		PET-A (5.34 g/mL)	1.29072	0.167927	PET-A (5.34 g/mL)	1.35804	0.0212298
		PET-R (5.34 g/mL)	1.41373	0.259278	PET-R (5.34 g/mL)	1.42037	0.0424759
		Bio-PBS (5.34 g/mL)	1.41887	0.0219751	Bio-PBS (5.34 g/mL)	1.34814	0.0560878
		SB (2.94 g/mL)	1.55786	0.0428836	SB (2.94 g/mL)	1.22177	0.216877
		PVC-R (5.34 g/mL)	1.19217	0.0696185	PVC-R (5.34 g/mL)	1.16761	0.309688
		PVC-A (5.34 g/mL)	1.76253	0.463731	PVC-A (5.34 g/mL)	1.33707	0.353829
	T3	Blank	1.1	0.0851399	Blank	1.01724	0.0142033
		LDPE (5.34 g/mL)	1.25488	0.307091	LDPE (5.34 g/mL)	1.52924	0.540978
		LDPE-R (5.34 g/mL)	2.07901	0.497316	LDPE-R (5.34 g/mL)	1.17055	0.176026
		PP-H (5.34 mg/mL)	1.15789	0.00476712	PP-H (5.34 g/mL)	1.19556	0.146976
		PP.C (5.34 g/mL)	1.08933	0.0629122	PP-C (5.34 g/mL)	1.23437	0.165922
		PS-GP (5.34 g/mL)	1.29023	0.228851	PS-GP (5.34 g/mL)	1.35664	0.0994876
		PS-HI (5.34 g/mL)	1.25235	0.220235	PS-GP (5.34 g/mL)	1.5098	0.52524
		PET-A (5.34 g/mL)	1.19418	0.0984371	PET-A (5.34 g/mL)	1.14276	0.271466
		PET-R (5.34 g/mL)	1.16716	0.0416442	PET-R (5.34 g/mL)	1.26373	0.375484
		Bio-PBS (5.34 g/mL)	1.1931	0.102715	Bio-PBS (5.34 g/mL)	1.16458	0.534225
		SB (2.94 g/mL)	2.26592	0.99414	SB (2.94 g/mL)	1.17794	0.295976
		PVC-R (5.34 g/mL)	1.44928	0.172919	PVC-R (5.34 g/mL)	0.981659	0.189337
		PVC-A (5.34 g/mL)	1.23044	0.0217724	PVC-A (5.34 g/mL)	1.11227	0.356301
	T4	Blank	1.23105	0.0603367	Blank	1.02174	0.294379
		LDPE (5.34 g/mL)	1.29262	0.255448	LDPE (5.34 g/mL)	1.35968	0.0585197
		LDPE-R (0.67 g/mL)	1.78423	0.0647613	LDPE-R (5.34 g/mL)	1.80502	0.526867
		PP-H (5.34 mg/mL)	1.24175	0.0985996	PP-H (5.34 g/mL)	1.39337	0.270438
		PP-C (5.34 g/mL)	1.28958	0.0713391	PP-C (5.34 g/mL)	1.31666	0.0667402
		PS-GP (5.34 g/mL)	1.14225	0.0523983	PS-GP (5.34 g/mL)	1.20693	0.307448
		PS-HI (5.34 g/mL)	1.12108	0.0154751	PS-GP (5.34 g/mL)	1.2843	0.155046
		PET-A (5.34 g/mL)	1.3875	0.269726	PET-A (5.34 g/mL)	1.28964	0.0683728
		PET-R (5.34 g/mL)	1.40359	0.19384	PET-R (5.34 g/mL)	1.31916	0.128163
		Bio-PBS (5.34 g/mL)	1.34678	0.405643	Bio-PBS (5.34 g/mL)	1.17533	0.28049
		SB (2.94 g/mL)	1.91732	0.321916	SB (2.94 g/mL)	1.45378	0.206069
		PVC-R (5.34 g/mL)	1.51811	0.103217	PVC-R (5.34 g/mL)	1.13032	0.3858
		PVC-A (5.34 g/mL)	1.50994	0.123005	PVC-A (5.34 g/mL)	0.913714	0.0697034
	*	Mean > 1.5 and both replicates with IF > 1.5
		Mean > 1.5but only one replicate with IF > 1.5
